# Supplementary material for: Use of immersive virtual reality for stress reduction during botulinum toxin injection for spasticity (RVTOX): a study protocol of a randomised control trial
Source: PubMed Central journal article supplement — BMJ Open. 2023 Oct 30;13(10):e066726. doi: 10.1136/bmjopen-2022-066726 (PMC10619105; doi:10.1136/bmjopen-2022-066726), 2023-10-30
Supplement: bmjopen-2022-066726supp002.pdf [file bmjopen-2022-066726supp002.pdf]

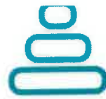

## DESCRIPTIFS CONTENUS DISPOSITIFS VRx

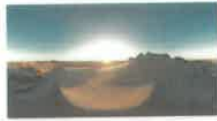

**Camargue** : Bord de mer, dunes de sable, vent dans les roseaux, flamands rose, chevaux.  
Contenu destiné à la sédation et l'analgésie.

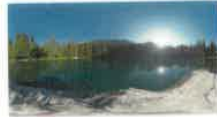

**Montagne en été** : Rivière, cascade, lac, promenade sur le thème de l'eau et ses bienfaits.  
Contenu lent et statique destiné à la sédation et l'analgésie.

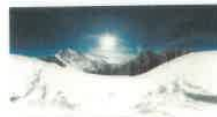

**Montagne en hiver** : La pureté du blanc, l'immobilité que confère la neige à toutes choses.  
Contenu lent et statique destiné à la sédation et l'analgésie.

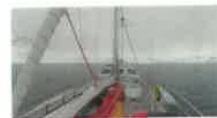

**Spitzberg** : Paysage de glace, navigation à bord d'un voilier au milieu de la banquise avec présence de personnes.  
Contenu destiné à la sédation et l'analgésie.

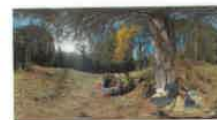

**Pique-nique en montagne** : Promenade automnale dans les Alpes autour d'un chalet et d'un pique-nique.  
Contenu calme destiné à la sédation.

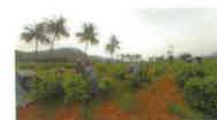

**Inde** : Voyage entre les villes, les campagnes et les temps colorés d'Inde avec parfois la présence de personne.  
Contenu lent et statique destiné à la sédation et l'analgésie.  
**Prévenir de la sensation de vertige.**

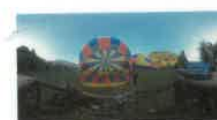

**Montgolfière** : Voyage en montgolfière avec le Mont Blanc au loin, du décollage à l'atterrissage.  
Contenu destiné à la sédation et l'analgésie forte.  
**Prévenir de la sensation de vertige.**

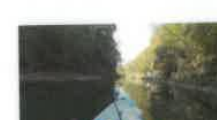

**Au fil de l'eau** : Descente d'une rivière calme à bord d'un canoë, bercé par un mouvement de balancier.  
Contenu destiné à la sédation forte et l'analgésie  
**Prévenir du risque du mal des transports**
